# Supplementary material for: Differential Effects on the Translation of Immune-Related Alternatively Polyadenylated mRNAs in Melanoma and T Cells by eIF4A Inhibition
Source: MDPI journal article supplement (doi:10.3390/cancers14051177), 2022-02-24
Supplement: s1 [file s1]

Supplementary Materials

# Differential Effects on the Translation of Immune-Related Alternatively Polyadenylated mRNAs in Melanoma and T Cells by eIF4A Inhibition

Biswendu Biswas, Ramdane Guemiri, Mandy Cadix, Céline M. Labbé, Alina Chakraborty, Martin Dutertre, Caroline Robert and Stéphan Vagner

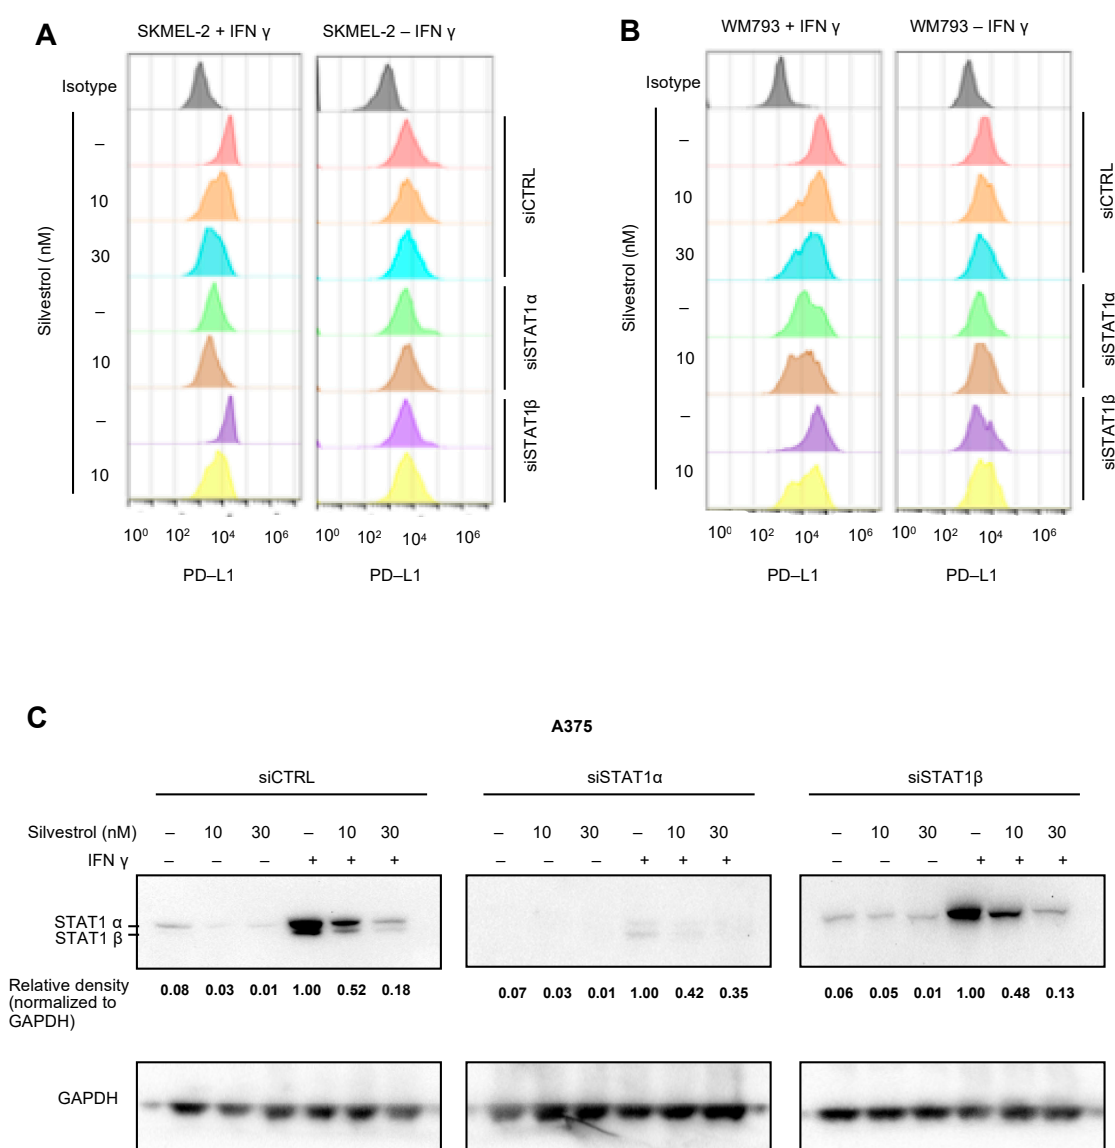

**Figure S1.** (A) PD-L1 was visualized by flow cytometry in SK-MEL-2 cells treated with IFN- $\gamma$  (100 ng/mL) and silvestrol (10 nM or 30 nM). (B) PD-L1 was visualized by flow cytometry in WM793 cells treated with or without IFN- $\gamma$  (100 ng/mL) and silvestrol (10 nM or 30 nM). (C) Western blot

analysis to look into the effect of silencing either STAT1 isoform in A375 cells treated with or without IFN- $\gamma$  for 24 h and silvestrol (10 nM or 30 nM) for 24 h. Quantification of STAT1 expression was performed by calculating the relative densities normalized to GAPDH levels. One representative blot from three independent experiments is shown.

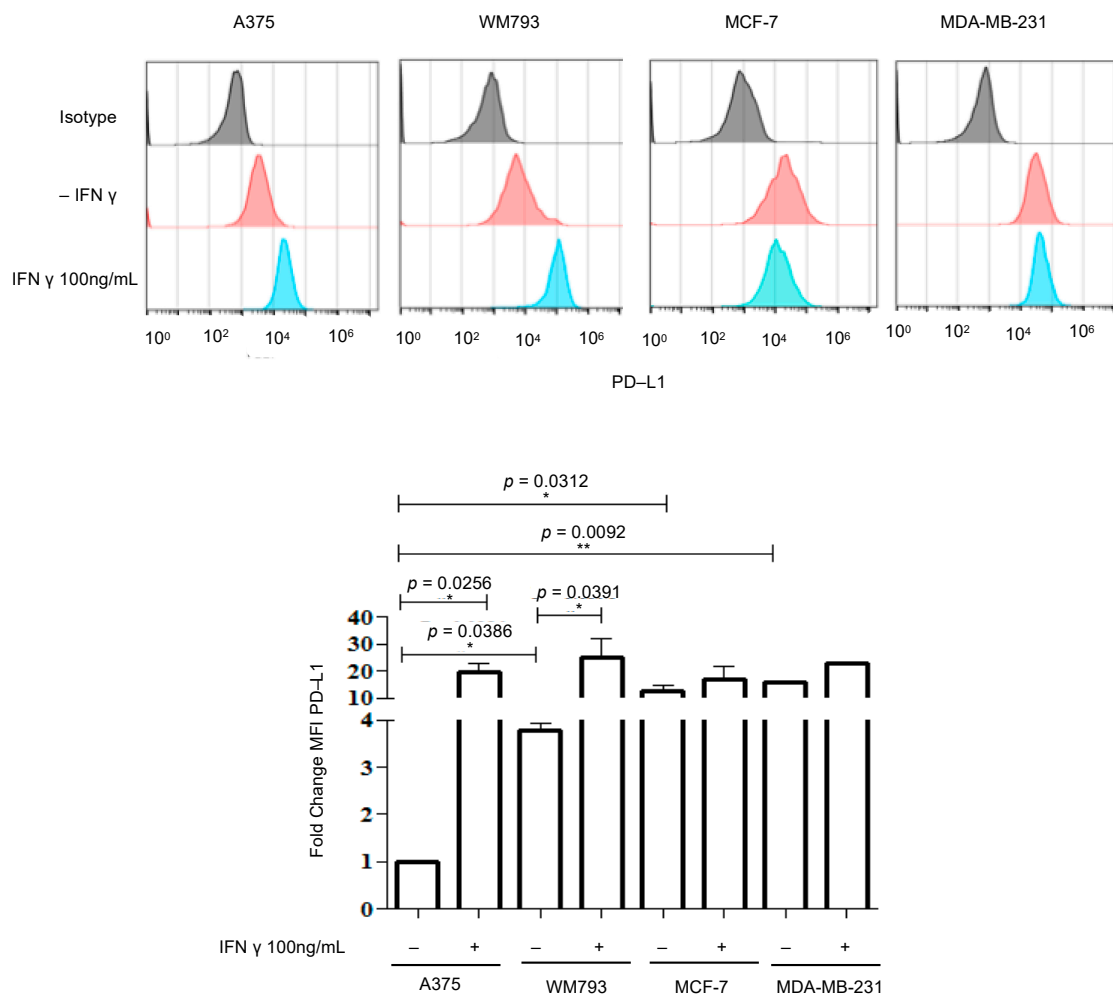

**Figure S2.** PD-L1 was visualized by flow cytometry in A375, WM793, MCF-7 and MDA-MB-231 cells treated without or with IFN- $\gamma$  (100 ng/mL). Bottom: PD-L1 mean fluorescence intensity (MFI) quantification. The data are presented as the mean  $\pm$  s.e.m. ( $n = 3$  independent experiments).  $p$ -values were calculated using a two-tailed unpaired  $t$ -test.

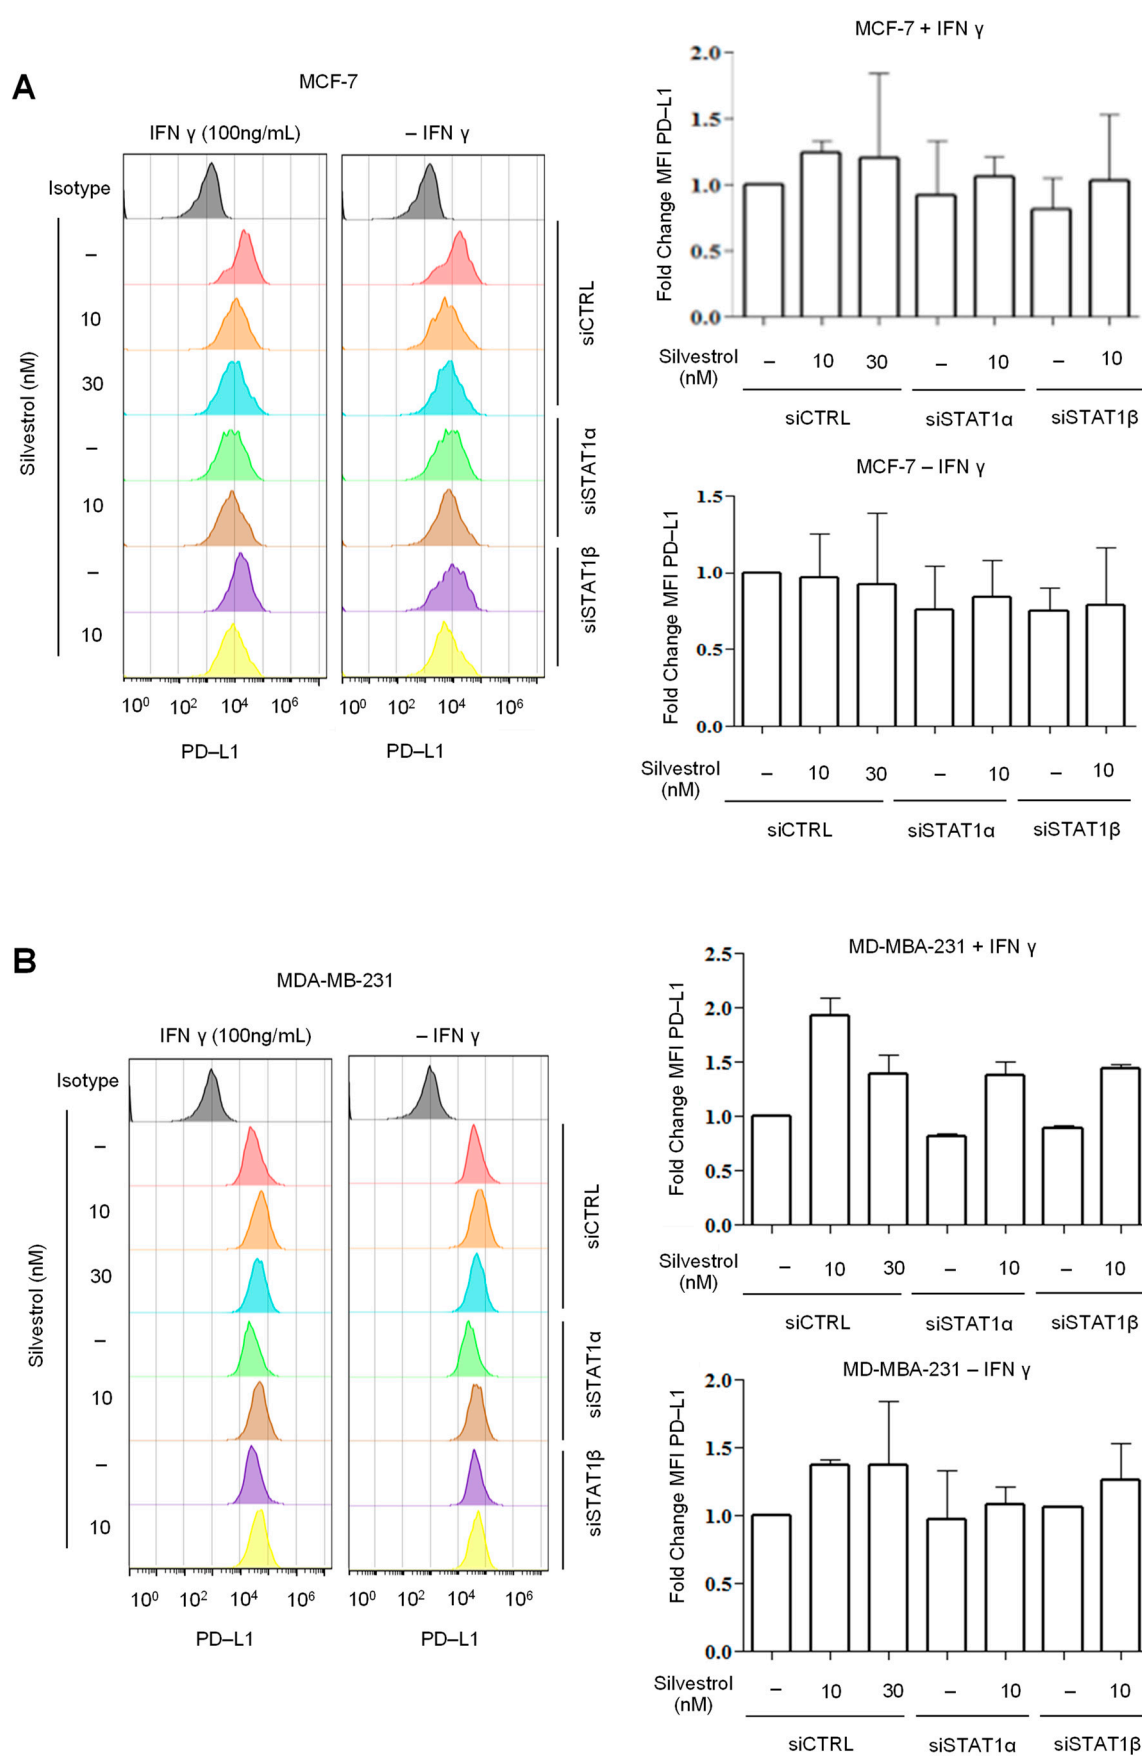

**Figure S3.** Left: PD-L1 was visualized by flow cytometry in (A) MCF-7 and (B) MDA-MB-231 cell lines treated with or without IFN- $\gamma$  (100 ng/mL) and silvestrol (10 nM or 30 nM). Right: PD-L1 mean

fluorescence intensity (MFI) quantification. The data are presented as the mean  $\pm$  s.e.m. ( $n = 3$  independent experiments).  $p$ -values were calculated using a two-tailed unpaired  $t$ -test. Bottom, Western blot analysis of the indicated proteins.

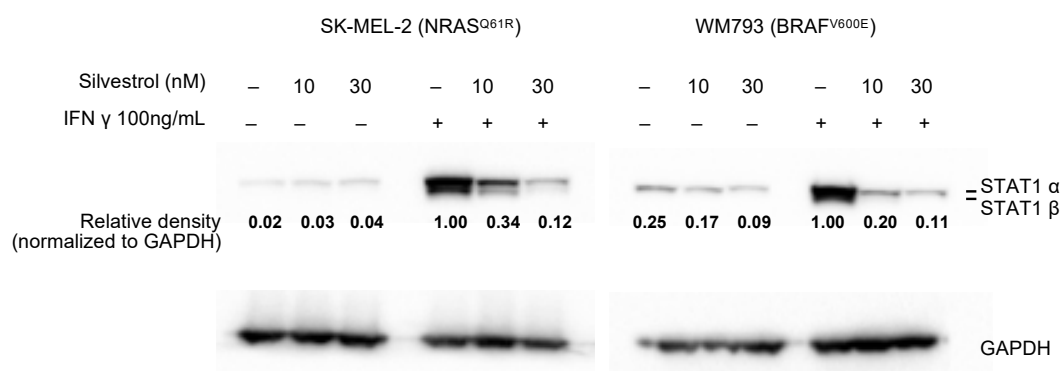

**Figure S4.** Western blot analysis to look into the expression of *STAT1* APA isoforms in SK-MEL-2 and WM793 cells treated with IFN- $\gamma$  for 24 h and silvestrol (10 nM or 30 nM) for 24 h. Quantification of *STAT1* expression was performed by calculating the relative densities normalized to GAPDH levels. One representative blot from three independent experiments is shown.

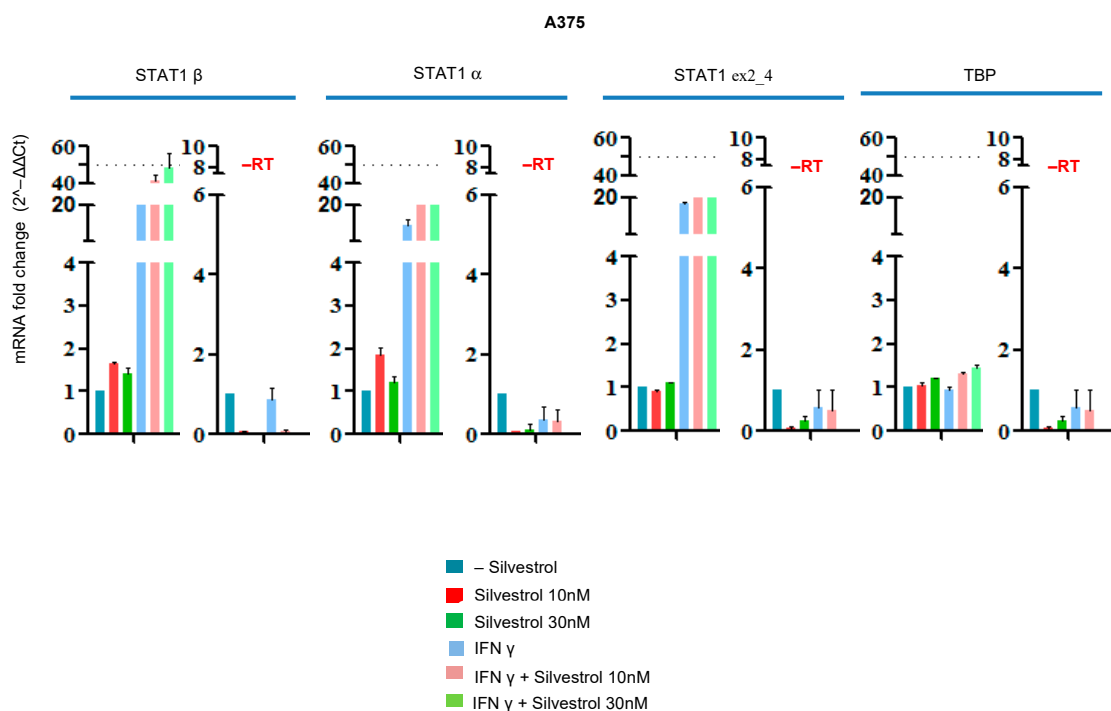

**Figure S5.** Relative mRNA expression of total and APA isoforms of *STAT1* and of *TBP* (control) in total (non-fractionated) lysates of A375 ( $n = 3$ ). A375 cells were treated without or with IFN- $\gamma$  for 24 h and silvestrol (10 nM or 30 nM) for 24 h.

**A***CD40-L* mRNA isoforms: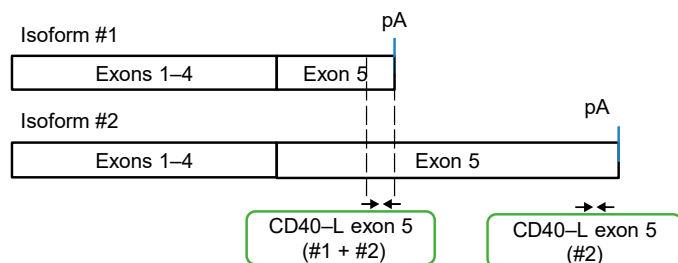*CD137* mRNA isoforms: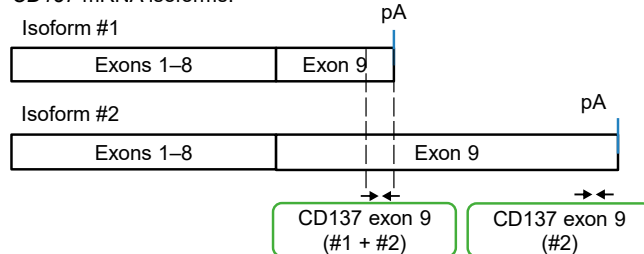*CD27* mRNA isoforms: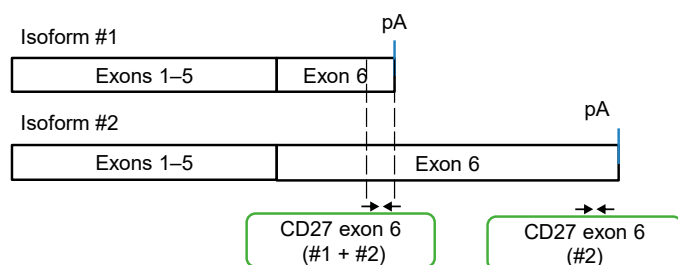*BTLA* mRNA isoforms: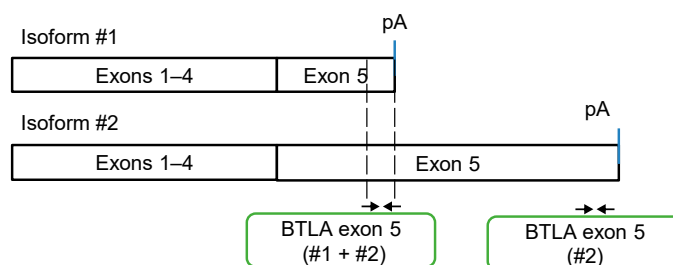*IDO1* mRNA isoforms: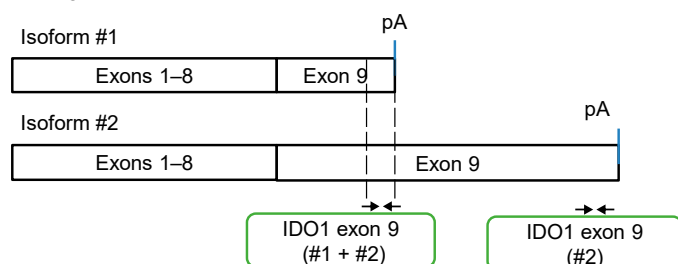*ADAR-1* mRNA isoforms: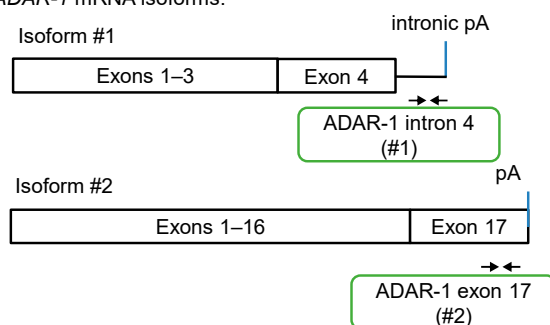

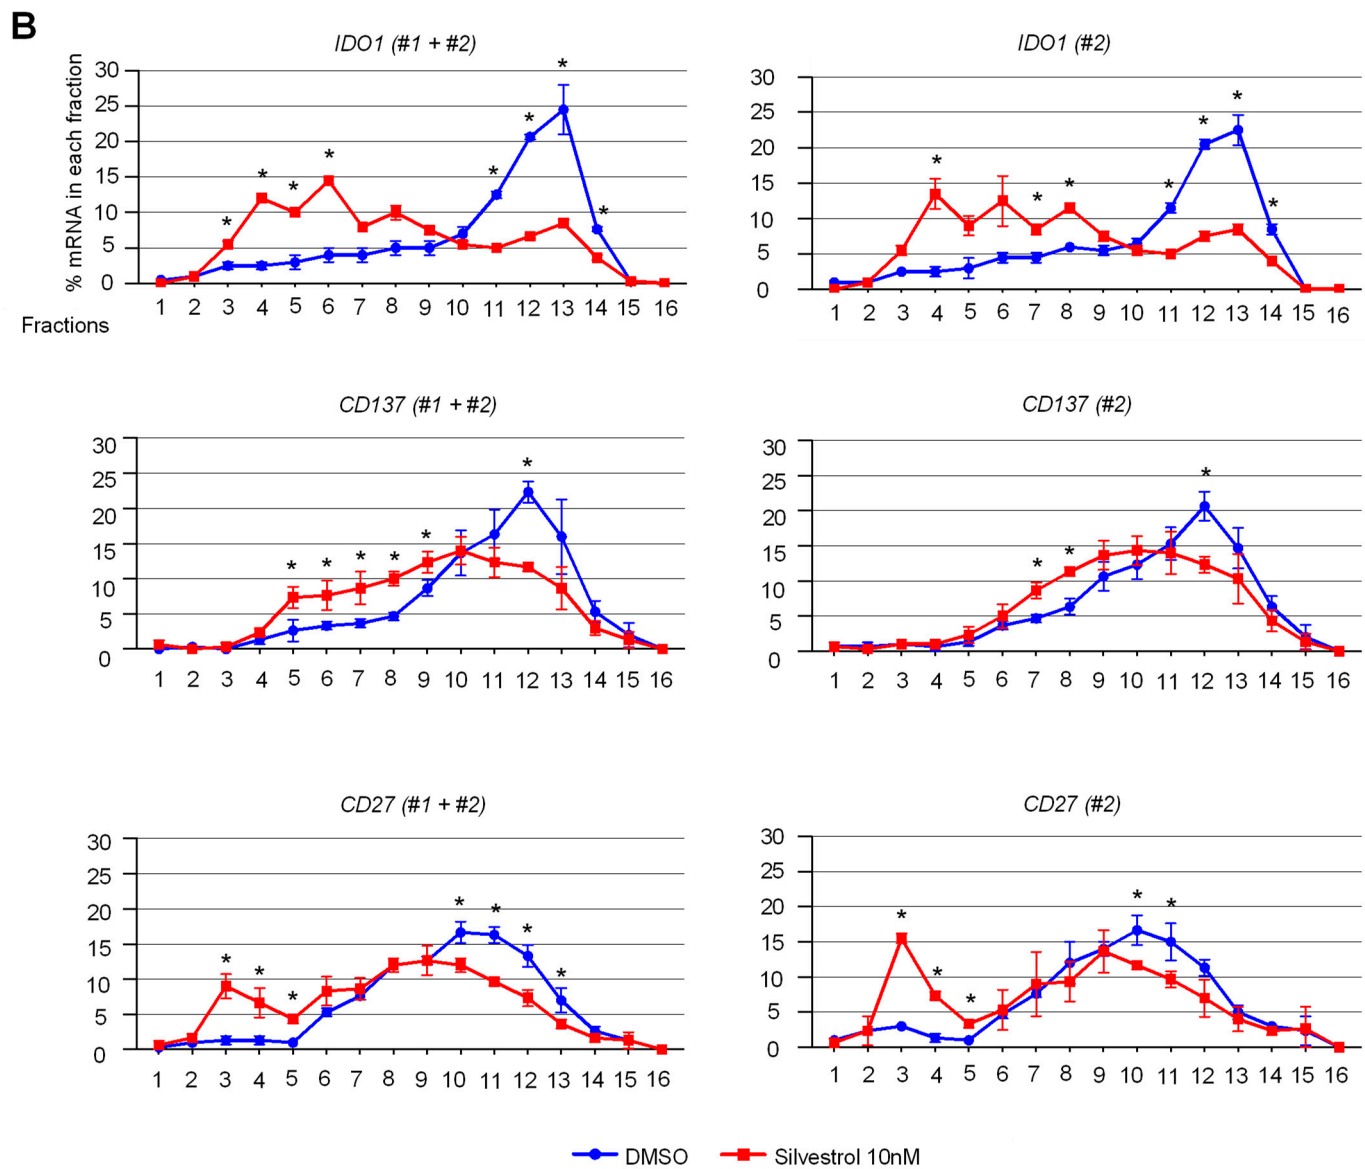

**B** (continued)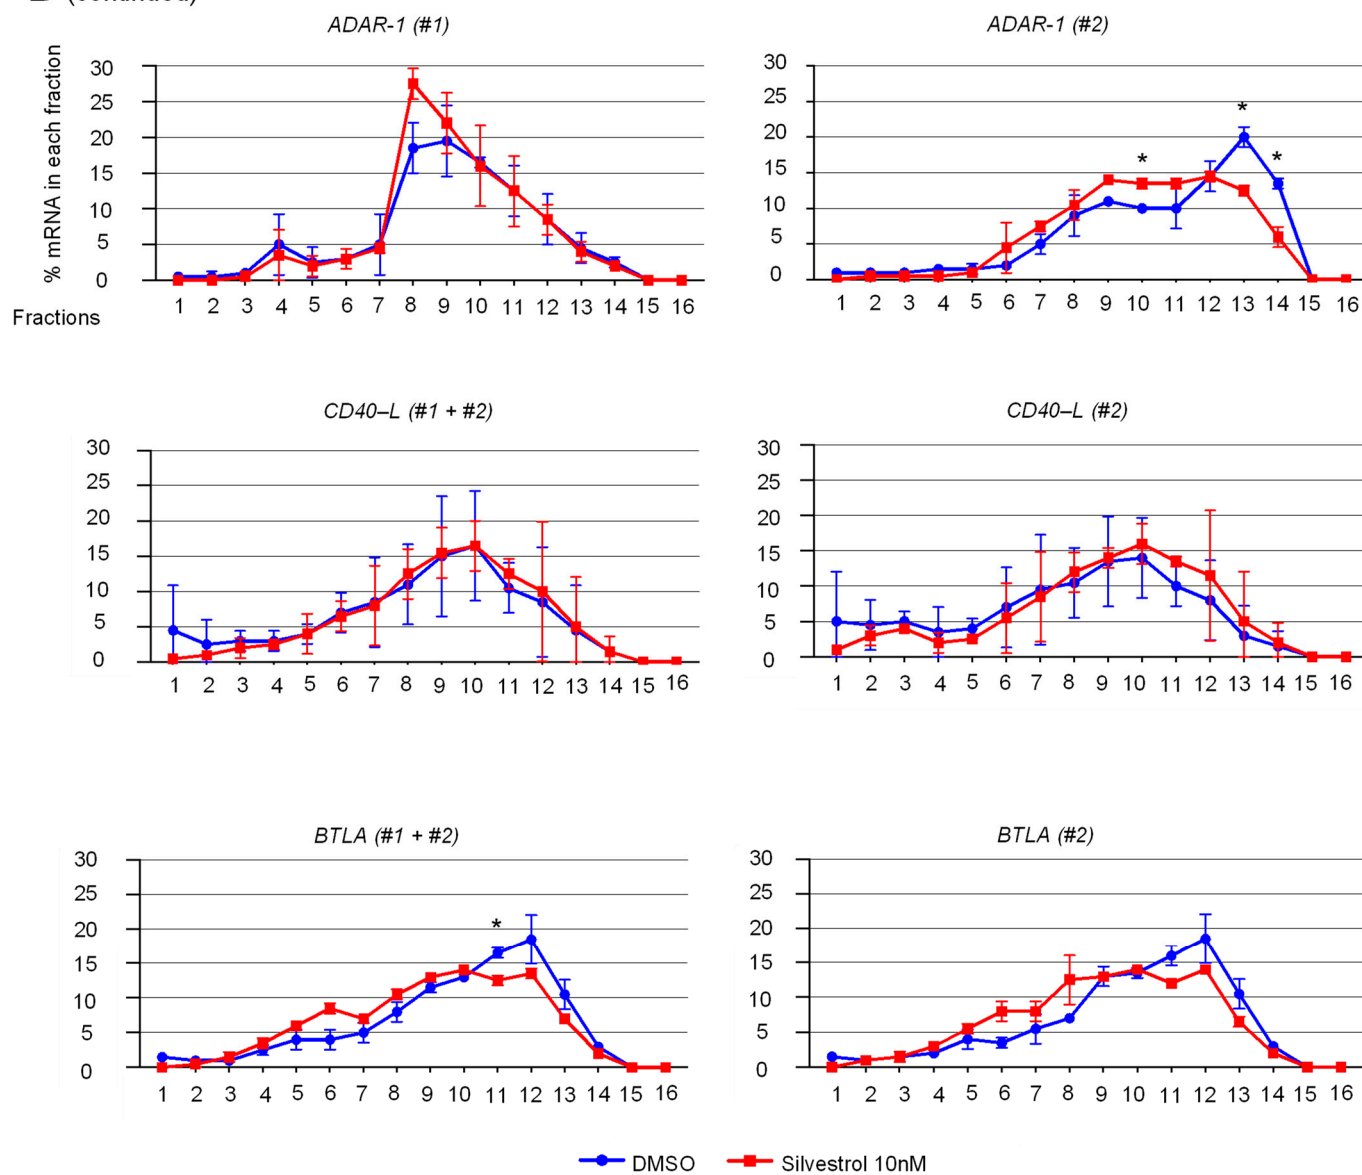

**Figure S6.** (A) Primer design for immune-related gene mRNA isoforms. (B) Percentage of transcripts for each APA isoform in each polysomal fraction obtained by sucrose-gradient ultracentrifugation was quantified by RT-qPCR ( $n = 3$ ).

**A****POU6F1 mRNA isoforms:**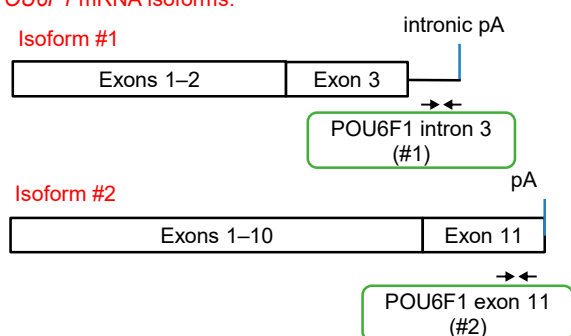**HPS3 mRNA isoforms:**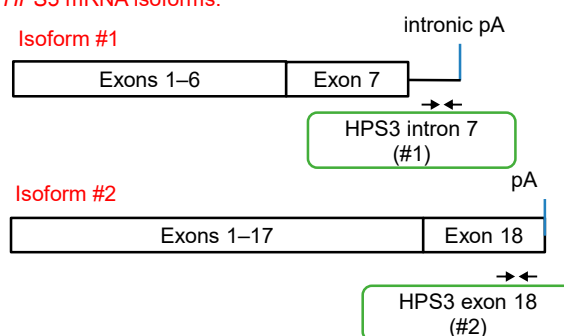**DENND1A mRNA isoforms:**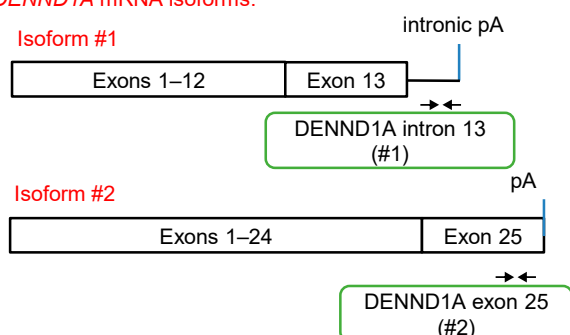**FBXO11 mRNA isoforms:**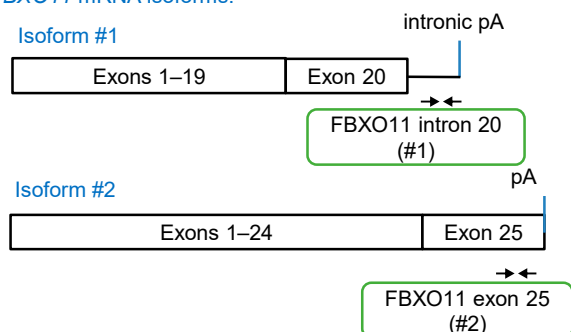**DIP2A mRNA isoforms:**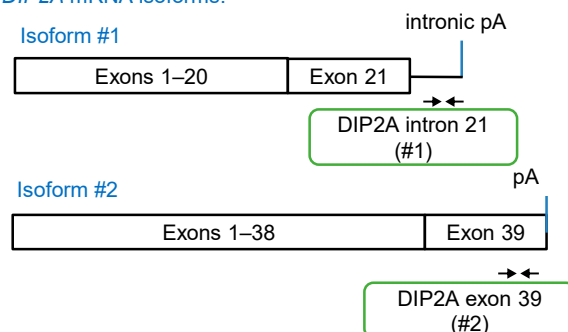



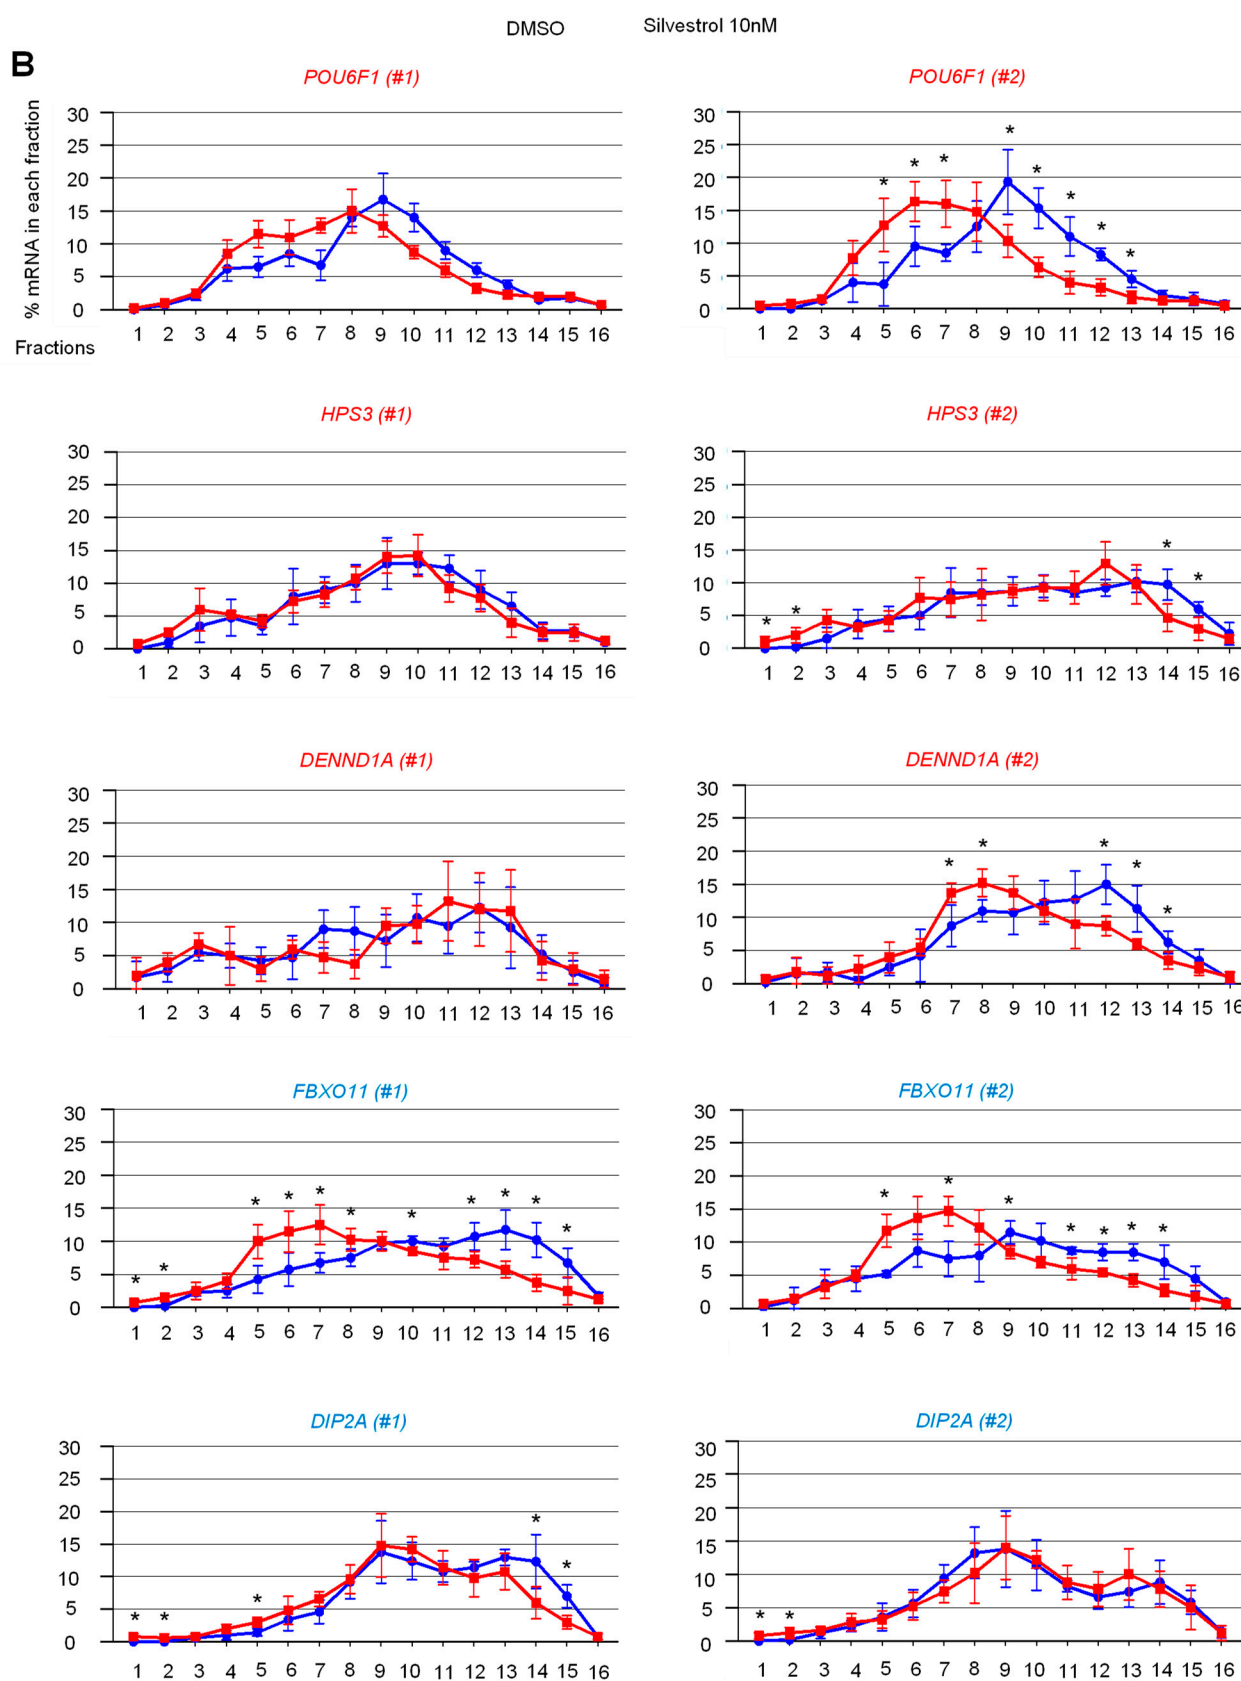

**Figure S7.** (A) Primer design for immune-related gene mRNA isoforms of IPA:LE UP (red) and IPA:LE DOWN (blue) candidates. (B) Percentage of transcripts for each APA isoform in each poly-somal fraction obtained by sucrose-gradient ultracentrifugation was quantified by RT-qPCR in Jurkat cells ( $n = 3$ ).

Figure 1C

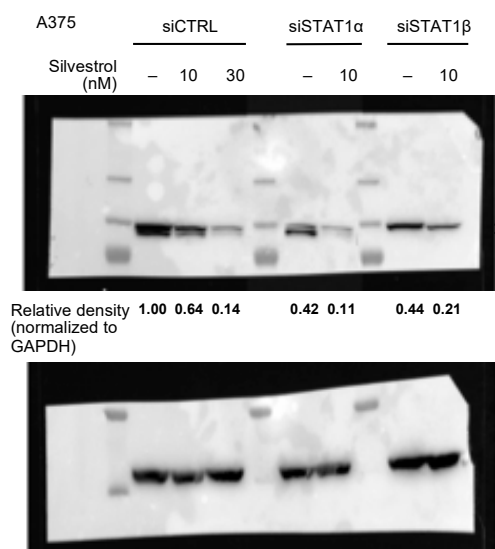

Figure 2D

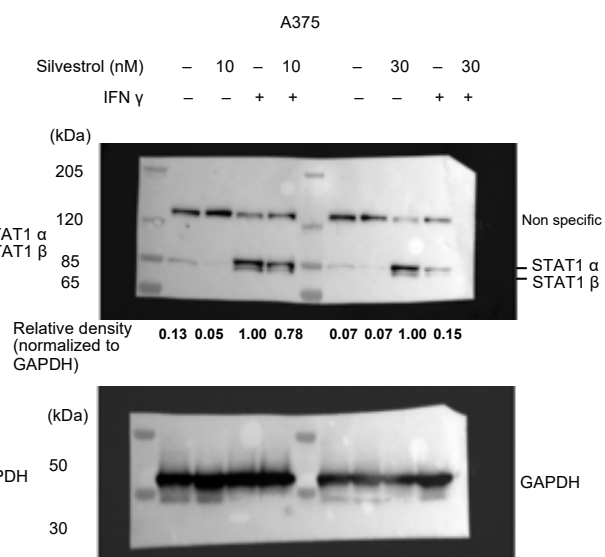

Figure 4E

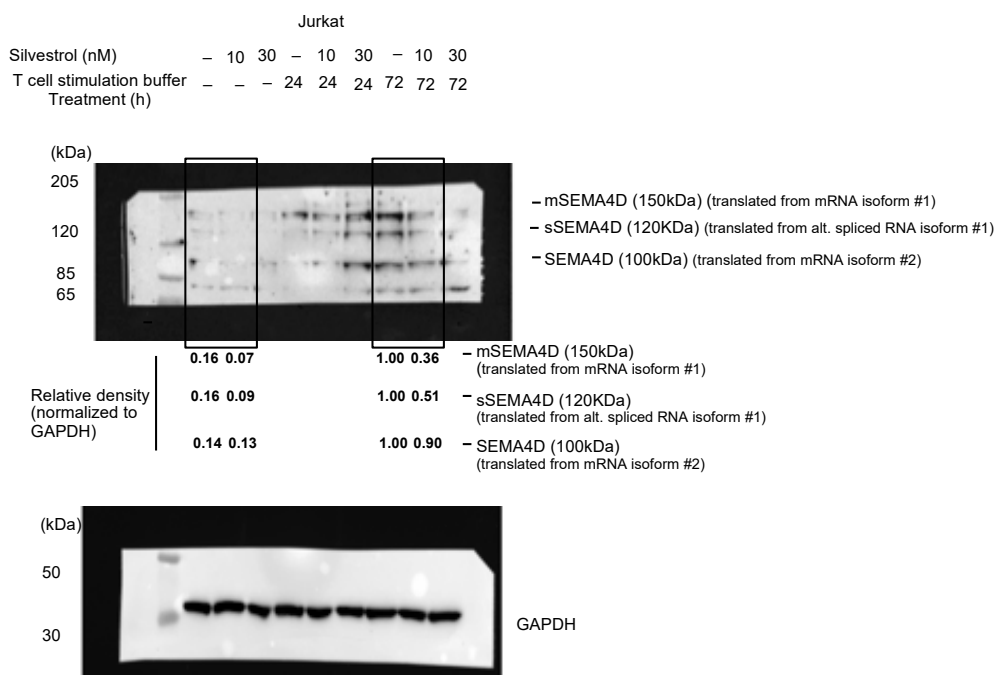

Figure S1C

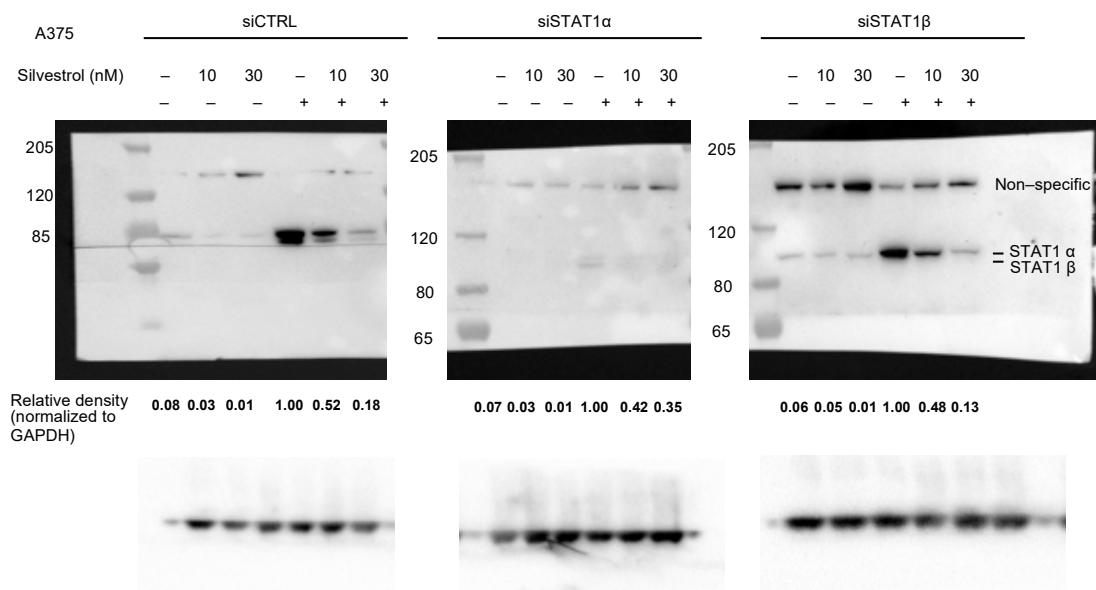

Figure S4

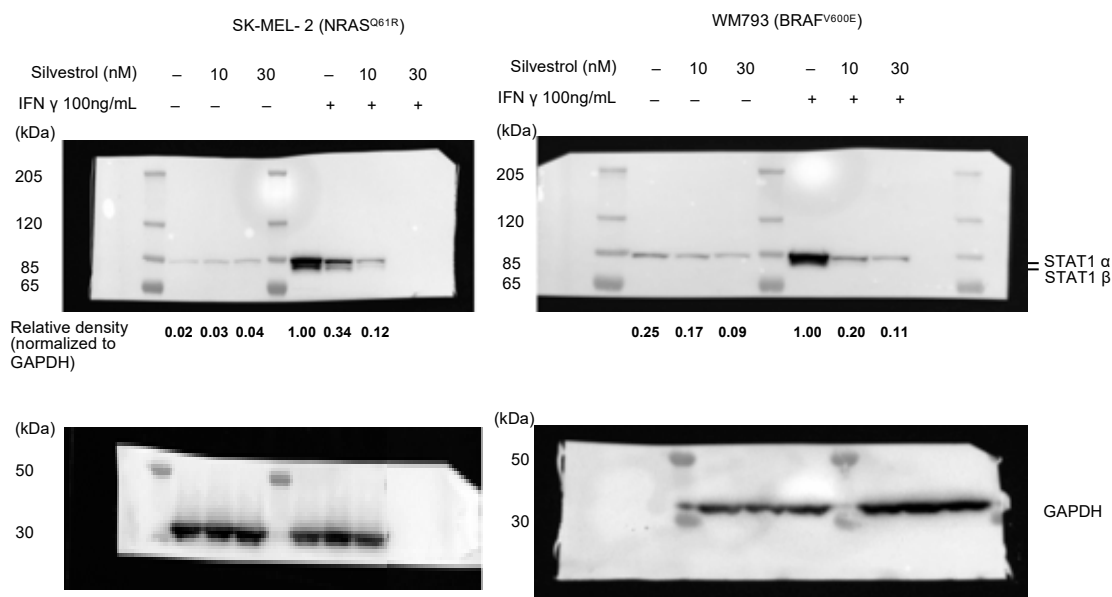

Figure S8. Uncropped Western Blot original images.

Table S1. Primer sequences used for RT-qPCR analysis of all mRNAs investigated in this paper.

| Primer Sequences      | Forward                  | Reverse                |
|-----------------------|--------------------------|------------------------|
| STAT1a                | AGTCAGTGCCCAACTGTTATAGG  | CCGTTCTACGTCAAGCAGT    |
| STAT1b                | ACTGCCTATCAGCATTTTACTACT | TCAAAGGGTATCAGTTTTGGGA |
| STAT1 ex.2_4          | GTGGCAGGATGTCTCAGTGG     | CAGCTGTGACAGGAGGTCAT   |
| PD-1 exon 5 (#1 + #2) | CTCTGTGGACTATGGGGAGC     | AGAGCAGTGTCCATCCTCAG   |

|                             |                                |                          |
|-----------------------------|--------------------------------|--------------------------|
| PD-1 exon 5 (#2)            | CCTGGGTGGGAAGGTACAG            | CCTTGTCCCAGCCACTCAG      |
| CTLA-4 exon 4 (#1 + #2)     | GCCCTCTTACAACAGGGGTCT          | GGCTGAAATTGCTTTTCACATTCT |
| CTLA-4 exon 4 (#2)          | CTCCAGGAGACCCACAGGTA           | CTGCTGCCTTCTTCTGTCCA     |
| TIM-3 exon 7 (#1 + #2 + #3) | CTCTTTGGCCAACCTCCCTC           | CATTGCAAAGCGACAACCCA     |
| TIM-3 exon 7 (#2 + #3)      | GGCAAAGGCCTTCAGCAATC           | AGGGGGCAACAATAAGCAAGA    |
| TIM-3 exon 7 (#3)           | TGGCTTAGGATTGACTTGGTG          | CCATGCTCATGGGTAGGAAG     |
| LAG-3 intron 5 (#1)         | AGACTAGGCAAACCCACCCT           | GAAAAGTGGGGGCCGAGAT      |
| LAG-3 exon 8 (#2)           | CGCAGGCTCAGAGCAAGATA           | GCCTCAGCTCCAGGTCAGA      |
| CD40-L exon 5 (#1 + #2)     | AAACCTTGCGGGCAACAATC           | TGACAAACACCGAAGCACCT     |
| CD40-L exon 5 (#2)          | GCCTGCCCCACTCCTCATTAC          | TCTGGAAACAATGGGAGACTGC   |
| CD137 exon 9 (#1 + #2)      | GTAACACGACATGCTCCACC           | GGACAAAGGCAGAAGGTGTG     |
| CD137 exon 9 (#2)           | TGGAAGATATCACTCTGACGGA         | AAGTCCTACCACACACAGGG     |
| CD27 exon 6 (#1 + #2)       | TGTCATTACAGCTGCCCCAG           | CAGGCTCCGGTTTTTCGGTAA    |
| CD27 exon 6 (#2)            | TCGAGACTGGCAGGGACG             | GCCCGTCTTG TAGCATGTG     |
| BTLA exon 5 (#1 + #2)       | GGTTTGTGTTACCTGCATCAGT         | GGTTGGTTAGTCAAATTGGGACA  |
| BTLA exon 5 (#2)            | TTCCCAAATGACTCTACTTCACT        | TCTCATTGAGCACAATCACAAGC  |
| IDO1 exon 9 (#1 + #2)       | CATCCTGATTCCTGCAAGCC           | TCAGTGCCTCCAGTTCCTTTG    |
| IDO1 exon 9 (#2)            | ACCCATTGTAACAGAGCCACAA         | TTCCTACAAGAAATGCACAGGT   |
| ADAR-1 intron 4 (#1)        | AACTGAGATTGCGCCACTG            | AGGCTGGTCTCGAATTCCTC     |
| ADAR-1 exon 17 (#2)         | CTCCAAGAGCAGAGTGAGGA           | GTCACTGTTATCAAGGGACACA   |
| AHNAK intron 5 (#1)         | TGGAGTGGAAGGAGACCTCG           | CACATCCACAGTGTAGGCCG     |
| AHNAK exon 7 (#2)           | GTAGAAGCGGCCAGGAAGAA           | GAACAATGCTCCAAAGAACGGT   |
| SEMA4D intron 18 (#1)       | CCAAAAATCCAACCTGGCCC           | AAGACCGTACTTGGGGCTCT     |
| SEMA4D exon 23 (#2)         | TCAACCCCAACAAGACCCTGC          | TCACAGTTGTGGGGGACCAG     |
| POU6F1 intron 3 (#1)        | TCCAGTCTTTGTACACATGC           | ACGTGGTGGTGT CATACTACT   |
| POU6F1 exon 11 (#2)         | TGAACTGCGGAACCAGGAAG           | CGTTTGCGTTTCTTGGAGGG     |
| HPS3 intron 7 (#1)          | TTTTGACTAAAGCAGAACCT-<br>GAAGC | GATGCTTACAGAAGCCTCTTGG   |
| HPS3 exon 18 (#2)           | CCCAGAAGATGGTACTGCAACA         | AGTCAATGGTTTCTTTCGACTGC  |
| DENND1A intron 13 (#1)      | AATGTGCAGCTGGAGGGAAA           | TCTCCACATGGATCCCTAGC     |
| DENND1A exon 25 (#2)        | CTCGAAGGCCCCAGAACC             | GTGATGCTGCCCAGAGTAGG     |
| FBXO11 intron 20 (#1)       | GCAATGGCTGGAGTCTGGAT           | CAGATGCCACCATCTCTTCCA    |
| FBXO11 exon 25 (#2)         | ACACTATATGACTCTGCTCCACC        | TGGCAGGACTTTTTCTTTAGGGA  |
| DIP2A intron 21 (#1)        | TTCATCGTGGGCAAACCTGGA          | GCCACAACGTCATCTGCATT     |
| DIP2A exon 39 (#2)          | GAGCAGGATGCCCTGGAC             | GTCCACGATGACCACCACTC     |
| TBP                         | TGACCTAAAGACCATTGCACTTCG       | CGTGGTTCGTGGCTCTCTTATC   |

---

|      |                      |                        |
|------|----------------------|------------------------|
| HPRT | GCTGAGGATTGGAAGGGTGT | CCATCTCCTTCATCACATCTCG |
|------|----------------------|------------------------|

---
